# Supplementary material for: Activated Peyer′s patch B cells sample antigen directly from M cells in the subepithelial dome
Source: PubMed Central journal article supplement (PMC6547658; doi:10.1038/s41467-019-10144-w), 2019-06-03
Supplement: 41467_2019_10144_MOESM3_ESM.pdf [file 41467_2019_10144_MOESM3_ESM.pdf]

## **Description of Additional Supplementary Files**

Supplementary Data 1

Description: RNAseq profiling: gene expression

Supplementary Data 2

Description: RNAseq profiling: gene expression
